# Supplementary material
Source: publisher site journal article supplement (https://www.dovepress.com/article/309267)
Supplement: Supplementary file 1 [file get_supplementary_file.php]

**Supplement table 1. Future exacerbations and mortality for different severity of airflow limitation in Groups A and B after 18 months of follow-up**

|  | **Group A(n = 133)** | | | | **P** | **Group B (n = 295)** | | | | **P** |
| --- | --- | --- | --- | --- | --- | --- | --- | --- | --- | --- |
| **Variables** | **GOLD** | | | | **value** | **GOLD** | | | | **value** |
|  | **I**  **(n = 33)** | **II**  **(n = 76)** | **III**  **(n = 21)** | **IV**  **(n = 3)** |  | **I**  **(n = 21)** | **II**  **(n = 125)** | **III**  **(n = 103)** | **IV**  **(n = 46)** |  |
| Exacerbations (Mean ± SD) | 0.1 ± 0.3 | 0.2 ± 0.5 | 0.2 ± 0.5 | 0 | 0.482 | 0.2 ± 0.4 | 0.3 ± 0.8 | 0.3 ± 0.7 | 0.4 ± 1.0 | 0.575 |
| Hospitalizations (Mean ± SD) | 0.1 ± 0.2 | 0.2 ± 0.4 | 0.1 ± 0.2 | 0 | 0.409 | 0.2 ± 0.4 | 0.2 ± 0.4 | 0.1 ± 0.4 | 0.2 ± 0.5 | 0.977 |
| Frequent exacerbator,  n (%) | 2 (6.1) | 11 (14.5) | 1 (4.8) | 0 (0) | 0.534 | 4 (19.1) | 17 (13.6) | 13 (12.6) | 9 (19.6) | 0.594 |
| Mortality, n (%) | 0 (0) | 1 (1.3) | 0 (0) | 0 (0) | 1.000 | 1 (4.8) | 8 (6.4) | 4 (3.9) | 0 (0) | 0.311 |

**Notes:** A value of P < 0.05 was considered statistically significant.

**Abbreviations:** GOLD, Global Initiative for Chronic Obstructive Lung Disease.

**Supplement table 2. Future exacerbations and mortality for different severity of airflow limitation in Groups C and D after 18 months of follow-up**

|  | **Group C(n = 103)** | | | | **P** | **Group D (n = 261)** | | | | **P** |
| --- | --- | --- | --- | --- | --- | --- | --- | --- | --- | --- |
| **Variables** | **GOLD** | | | | **value** | **GOLD** | | | | **value** |
|  | **I**  **(n = 15)** | **II**  **(n = 48)** | **III**  **(n = 31)** | **IV**  **(n = 9)** |  | **I**  **(n = 13)** | **II**  **(n = 80)** | **III**  **(n = 114)** | **IV**  **(n = 54)** |  |
| Exacerbations (Mean ± SD) | 0.3 ± 0.6 | 0.3 ± 0.6 | 0.4 ± 0.8 | 0.7 ± 1.3 | 0.351 | 0.8 ± 1.5 | 0.6 ± 1.2 | 0.7 ± 1.2 | 1.1 ± 1.8 | 0.310 |
| Hospitalizations (Mean ± SD) | 0.3 ± 0.5 | 0.2 ± 0.4 | 0.2 ± 0.5 | 0.5 ± 0.8 | 0.051 | 0.2 ± 0.6 | 0.3 ± 0.8 | 0.3 ± 0.5 | 0.4 ± 0.9 | 0.685 |
| Frequent exacerbator,  n (%) | 4 (26.7) | 8 (16.7) | 5 (16.1) | 4 (44.4) | 0.223 | 4 (30.8) | 19 (23.8) | 32 (28.1) | 15 (27.8) | 0.893 |
| Mortality, n (%) | 0 (0) | 2 (4.2) | 1 (3.2) | 0 (0) | 1.000 | 0 (0) | 4 (5.0) | 9 (7.9) | 9 (16.7) | 0.097 |

**Notes:** A value of P < 0.05 was considered statistically significant.

**Abbreviations:** GOLD, Global Initiative for Chronic Obstructive Lung Disease.

**Supplement table 3. The baseline characteristics between the patients who remained in the study (N= 792) and lost to follow-up (N= 201)**

| **Variables** | **Group A (n = 170)** | | **P** | **Group B (n = 360)** | | **P** | **Group C (n = 122)** | | **P** | **Group D (n = 341)** | | **P** | |
| --- | --- | --- | --- | --- | --- | --- | --- | --- | --- | --- | --- | --- | --- |
| **A1**  **(n = 133)** | **A2**  **(n = 37)** | **value** | **B1**  **(n = 295)** | **B2**  **(n = 65)** | **value** | **C1**  **(n = 103)** | **C2**  **(n = 19)** | **value** | **D1**  **(n = 261)** | **D2**  **(n = 80)** | **value** | |
| Age (years) | 61.0 ± 7.3 | 63.3 ± 9.6 | 0.109 | 65.2 ± 8.1 | 64.5 ± 8.3 | 0.554 | 62.8 ± 9.2 | 64.3 ± 8.4 | 0.505 | 66.9 ± 7.9 | 66.3 ± 8.3 | | 0.601 |
| Female, n (%) | 14 (10.5) | 7 (18.9) | 0.170 | 34 (11.5) | 6 (9.2) | 0.594 | 7 (6.8) | 2 (10.5) | 0.630 | 32 (12.3) | 10 (12.5) | | 0.955 |
| Schooling level, n (%) |  |  | 0.143 |  |  | 0.180 |  |  | 0.799 |  |  | | 0.358 |
| Primary school | 44 (33.1) | 15 (40.5) |  | 124 (42.0) | 24 (36.9) |  | 46 (44.7) | 10 (52.7) |  | 121 (46.4) | 39 ((48.8) | |  |
| Junior high school | 43 (32.3) | 14 (37.9) |  | 112 (38.0) | 20 (30.8) |  | 41 (39.8) | 7 (36.8) |  | 96 (36.8) | 24 (30) | |  |
| High school | 33 (24.8) | 3 (8.1) |  | 46 (15.6) | 17 (26.2) |  | 9 (8.7) | 2 (10.5) |  | 32 (12.2) | 15 (18.7) | |  |
| University | 13 (9.8) | 5 (13.5) |  | 13 (4.4) | 4 (6.1) |  | 7 (6.8) | 0 (0) |  | 12 (4.6) | 2 (2.5) | |  |
| BMI (kg/m2) | 23.0 ± 3.3 | 23.5 ± 4.5 | 0.515 | 22.7 ± 3.7 | 22.8 ± 4.0 | 0.872 | 22.4 ± 3.4 | 23.3 ± 3.5 | 0.120 | 22.2 ± 3.7 | 22.4 ± 3.7 | | 0.637 |
| Smoking history,  n (%) |  |  | 0.453 |  |  | 0.590 |  |  | 0.210 |  |  | | 0.479 |
| Never-smoker | 23 (17.3) | 7 (18.9) |  | 54 (18.3) | 11 (16.9) |  | 14 (13.6) | 5 (26.3) |  | 51 (19.5) | 18 (22.5) | |  |
| Ex-smoker | 31 (23.3) | 12 (32.4) |  | 94 (31.9) | 25 (38.5) |  | 33 (32.0) | 3 (15.8) |  | 101 (38.7) | 25 (31.3) | |  |
| Current-smoker | 79 (59.4) | 18 (48.7) |  | 147 (49.8) | 29 (44.6) |  | 56 (54.4) | 11 (57.9) |  | 109 (41.8) | 37 (46.2) | |  |
| Smoke  (pack/year)  (Median, IQR) | 30 (30) | 32.5 (30.5) | 0.127 | 30 (30) | 34 (35) | 0.742 | 38 (35) | 30 (45) | 0.305 | 30 (28) | 30 (40) | | 0.876 |
| Biofuel exposure,  n (%) |  |  | 0.784 |  |  | 0.880 |  |  | 0.228 |  |  | | 0.111 |
| No | 100 (75.2) | 27 (73.0) |  | 174 (59.0) | 39 (60.0) |  | 64 (62.1) | 9 (47.4) |  | 144 (55.2) | 36 (45.0) | |  |
| Occupational exposure, n (%) |  |  | 0.399 |  |  | 0.638 |  |  | 0.960 |  |  | | 0.524 |
| No | 89 (66.9) | 22 (59.5) |  | 186 (63.1) | 43 (66.2) |  | 59 (57.3) | 11 (57.9) |  | 156 (59.8) | 51 (63.7) | |  |
| CAT  (Mean ± SD) | 9.6 ± 4.7 | 11.1 ± 4.2 | 0.306 | 16.4 ± 5.3 | 17.6 ± 4.0 | 0.098 | 13.4 ± 5.1 | 14.5 ± 4.9 | 0.400 | 19.4 ± 5.9 | 18.7 ± 5.3 | | 0.381 |
| mMRC  (Median, IQR) | 1 (0) | 1 (0) | 0.279 | 2 (1) | 3 (1) | 0.185 | 1 (1) | 1 (0) | 0.112 | 3 (1) | 3 (1) | | 1.000 |
| CCQ  (Mean ± SD) | 15.3 ± 5.7 | 16.8 ± 6.2 | 0.263 | 23.0 ± 5.6 | 21.8 ± 5.9 | 0.108 | 19.3 ± 5.9 | 18.5 ± 5.0 | 0.552 | 25.7 ± 5.9 | 24.8 ± 5.6 | | 0.260 |
| Treatments, n (%) |  |  |  |  |  |  |  |  |  |  |  | |  |
| Any COPD medication | 124 (93.2) | 33 (89.2) | 0.483 | 288 (97.6) | 63 (96.9) | 0.668 | 98 (95.1) | 17 (89.5) | 0.299 | 249 (95.4) | 79 (98.8) | | 0.314 |
| LAMA | 67 (50.4) | 20 (54.1) |  | 94 (31.9) | 29 (44.6) | 0.060 | 53 (51.5) | 7 (36.8) | 0.242 | 80 (30.7) | 31 (38.8) | | 0.176 |
| LABA + ICS | 10 (7.5) | 2 (5.4) |  | 29 (9.8) | 4 (6.2) | 0.352 | 8 (7.8) | 2 (10.5) | 0.654 | 14 (5.4) | 4 (50) | | 1.000 |
| LAMA+LABA | 1 (0.8) | 0 (0) |  | 2 (0.7) | 0 (0) | 1.000 | 0 (0) | 0 (0) | N/A | 4 (1.5) | 0 (0) | | 0.577 |
| LAMA+LABA +ICS | 44 (33.1) | 11 (29.7) |  | 161 (54.6) | 29 (44.6) | 0.145 | 36 (34.9) | 7 (36.8) | 0.874 | 152 (58.2) | 43 (53.8) | | 0.478 |
| Exacerbations  in the past year  (Mean ± SD) | 0.1 ± 0.3 | 0.2 ± 0.4 | 0.346 | 0.1 ± 0.3 | 0.2 ± 0.4 | 0.308 | 3.1 ± 3.2 | 3.4 ± 3.5 | 0.639 | 3.3 ± 3.8 | 3.9 ± 4.9 | | 0.224 |
| Hospitalizations in the past year  (Mean ± SD) | 0 | 0 | N/A | 0 | 0 | N/A | 1.0 ± 1.0 | 0.6 ± 0.7 | 0.140 | 1.4 ± 1.6 | 1.3 ± 1.3 | | 0.812 |

**Notes:** Group A1, B1, C1 and D1: The COPD patients who remained in the study after 18 months of follow-up; Group A2, B2, C2 and D2: The COPD patients who lost to follow-up. A value of P < 0.05 was considered statistically significant.

**Abbreviations:** BMI, Body Mass Index; CAT, COPD Assessment Test; CCQ, Clinical COPD Questionnaire; ICS, Inhaled Corticosteroid; LAMA, Long-Acting Muscarinic Antagonist; LABA, Long-Acting β2-Agonist; mMRC, modiﬁed Medical Research Council. N/A means not applicable.

**Supplement table 4. The pulmonary function data between the patients who remained in the study(N= 792) and lost to follow-up (N= 201)**

| **Variables** | **Group A (n = 170)** | | **P** | **Group B (n = 360)** | | **P** | **Group C (n = 122)** | | **P** | **Group D (n = 341)** | | **P** |
| --- | --- | --- | --- | --- | --- | --- | --- | --- | --- | --- | --- | --- |
| **A1**  **(n = 133)** | **A2**  **(n = 37)** | **value** | **B1**  **(n = 295)** | **B2**  **(n = 65)** | **value** | **C1**  **(n = 103)** | **C2**  **(n = 19)** | **value** | **D1**  **(n = 261)** | **D2**  **(n = 80)** | **value** |
| FEV1% | 66.7 ± 19.3 | 62.2 ± 14.9 | 0.184 | 50.0 ± 18.9 | 48.3 ± 18.0 | 0.490 | 57.9 ± 21.7 | 67.4 ± 23.5 | 0.087 | 45.3 ± 17.9 | 47.0 ± 19.3 | 0.459 |
| FEV1/FVC | 55.1 ± 10.5 | 52.6 ± 10.3 | 0.212 | 44.9 ± 12.5 | 43.4 ± 12.8 | 0.372 | 53.8 ± 12.6 | 55.3 ± 13.9 | 0.875 | 42.7 ± 11.8 | 43.7 ± 12.0 | 0.530 |
| FVC% | 95.8 ± 17.9 | 93.0 ± 14.7 | 0.386 | 86.5 ± 17.4 | 87.1 ± 17.6 | 0.774 | 90.7 ± 19.0 | 94.0 ± 15.1 | 0.476 | 82.3 ± 19.3 | 82.7 ± 16.9 | 0.852 |
| MEF25% | 25.5 ± 13.7 | 28.4 ± 20.3 | 0.314 | 22.1 ± 14.5 | 21.0 ± 13.1 | 0.586 | 24.7 ± 20.4 | 30.6 ± 20.9 | 0.257 | 21.1 ± 15.4 | 19.0 ± 13.1 | 0.258 |
| MEF75% | 37.6 ± 17.7 | 34.9 ± 16.7 | 0.056 | 23.2 ± 17.4 | 21.3 ± 15.8 | 0.426 | 29.8 ± 20.8 | 33.7 ± 24.5 | 0.251 | 18.7 ± 16.4 | 20.8 ± 17.8 | 0.317 |
| PEF% | 63.7 ± 24.7 | 56.7 ± 19.6 | 0.114 | 47.3 ± 18.8 | 45.1 ± 18.8 | 0.396 | 53.9 ± 20.6 | 56.9 ± 20.1 | 0.568 | 41.9 ± 18.8 | 44.4 ± 21.5 | 0.318 |
| Bronchodilator test, n (%) |  |  | 0.415 |  |  | 0.087 |  |  | 1.000 |  |  | 0.068 |
| Positive | 19 (14.3) | 3 (8.1) |  | 47 (15.9) | 5 (7.7) |  | 15 (14.6) | 2 (10.5) |  | 27 (10.3) | 3 (3.8) |  |
| Negative | 114 (85.7) | 34 (91.9) |  | 248 (84.1) | 60 (92.3) |  | 88 (85.4) | 17 (89.5) |  | 234 (89.7) | 77 (96.2) |  |
| Severity of airflow limitation, n (%) |  |  | 0.180 |  |  | 0.717 |  |  | 0.148 |  |  | 0.951 |
| I | 33 (24.8) | 4 (10.8) |  | 21 (7.1) | 5 (7.7) |  | 15 (14.6) | 6 (31.6) |  | 13 (5.0) | 5 (6.3) |  |
| II | 76 (57.1) | 28 (75.7) |  | 125 (42.4) | 23 (35.4) |  | 48 (46.6) | 9 (47.4) |  | 80 (30.7) | 25 (31.2) |  |
| III | 21 (15.8) | 5 (13.5) |  | 103 (34.9) | 27 (41.5) |  | 31 (30.1) | 2 (10.5) |  | 114 (43.7) | 35 (43.8) |  |
| IV | 3 (2.3) | 0 (0) |  | 46 (15.6) | 10 (15.4) |  | 9 (8.7) | 2 (10.5) |  | 54 (20.6) | 15 (18.7) |  |

**Notes:** Group A1, B1, C1 and D1: The COPD patients who remained in the study after 18 months of follow-up; Group A2, B2, C2 and D2: The COPD patients who lost to follow-up.A value of P < 0.05 was considered statistically significant.

**Abbreviations:** COPD, Chronic Obstructive Pulmonary Disease; FEV1, Forced Expiratory Volume in one second; FVC, Forced Vital Capacity; MEF, Maximal Expiratory Flow; PEF, Peak Expiratory Flow.

**Supplement table 5.** **Future exacerbations between the patients of pharmacological regimens remained stable and patients who stop drugs treatment in Groups A and B after 18 months of follow-up**

|  | **GOLD I-II** | | **P** | **GOLD III-IV** | | **P** | **GOLD I-II** | | **P** | **GOLD III-IV** | | **P** |
| --- | --- | --- | --- | --- | --- | --- | --- | --- | --- | --- | --- | --- |
| **Variables** | **Group A(n = 109)** | | **value** | **Group A(n = 23)** | | **value** | **Group B(n = 137)** | | **value** | **Group B(n = 145)** | | **value** |
|  | **A1**  **(n = 89)** | **A2**  **(n= 20)** |  | **A1**  **(n = 19)** | **A2**  **(n = 4)** |  | **B1**  **(n = 106)** | **B2**  **(n = 131)** |  | **B1**  **(n = 124)** | **B2**  **(n = 21)** |  |
| Exacerbations (Mean ± SD) | 0.2 ± 0.5 | 0.2 ± 0.5 | 0.758 | 0.1 ± 0.3 | 0.1 ± 0.4 | 0.654 | 0.3 ± 0.8 | 0.3 ± 0.6 | 0.681 | 0.3 ± 0.8 | 0.4 ± 0.9 | 0.828 |
| Hospitalizations  (Mean ± SD) | 0.1 ± 0.4 | 0.1 ± 0.3 | 0.565 | 0.1 ± 0.3 | 0 | 0.478 | 0.2 ± 0.4 | 0.1 ± 0.3 | 0.088 | 0.2 ± 0.4 | 0.2 ± 0.6 | 0.482 |

**Notes:** Groups A1 and B1, patients of pharmacological regimens remained stable; Groups A2 and B2, patients who stop drugs treatment.A value of P < 0.05 was considered statistically significant.

**Abbreviations:** GOLD, Global Initiative for Chronic Obstructive Lung Disease.

**Supplement table 6. Future exacerbations between the patients of pharmacological regimens remained stable and patients who stop drugs treatment in Groups C and D after 18 months of follow-up**

|  | **GOLD I-II** | | **P** | **GOLD III-IV** | | **P** | **GOLD I-II** | | **P** | **GOLD III-IV** | | **P** |
| --- | --- | --- | --- | --- | --- | --- | --- | --- | --- | --- | --- | --- |
| **Variables** | **Group C(n = 61)** | | **value** | **Group C(n = 39)** | | **value** | **Group D(n = 89)** | | **value** | **Group D(n = 150)** | | **value** |
|  | **C1**  **(n = 43)** | **C2**  **(n= 18)** |  | **C1**  **(n = 34)** | **C2**  **(n = 5)** |  | **D1**  **(n = 73)** | **D2**  **(n = 16)** |  | **D1**  **(n = 128)** | **D2**  **(n = 22)** |  |
| Exacerbations (Mean ± SD) | 0.3 ± 0.6 | 0.3 ± 0.7 | 0.854 | 0.6 ± 0.9 | 0.2 ± 0.4 | 0.420 | 0.7 ± 1.2 | 0.6 ± 1.3 | 0.778 | 0.8 ± 1.0 | 0.6 ± 0.7 | 0.185 |
| Hospitalizations (Mean ± SD) | 0.2 ± 0.4 | 0.1 ± 0.5 | 0.773 | 0.4 ± 0.8 | 0.1 ± 0.3 | 0.308 | 0.3 ± 0.7 | 0.5 ± 1.3 | 0.313 | 0.3 ± 0.7 | 0.3 ± 0.6 | 0.721 |

**Notes:** Groups C1 and D1, patients of pharmacological regimens remained stable; Groups C2 and D2, patients who stop drugs treatment.A value of P < 0.05 was considered statistically significant.

**Abbreviations:** GOLD, Global Initiative for Chronic Obstructive Lung Disease.
